# Supplementary material for: Seeing the Forest through the (Phylogenetic) Trees: Functional Characterisation of Grapevine Terpene Synthase (VviTPS) Paralogues and Orthologues
Source: MDPI journal article supplement (doi:10.3390/plants10081520), 2021-07-26

Figure S1: Complete phylogenetic tree of the gene models predicted from WGRS mappings with the primer bindings indicated

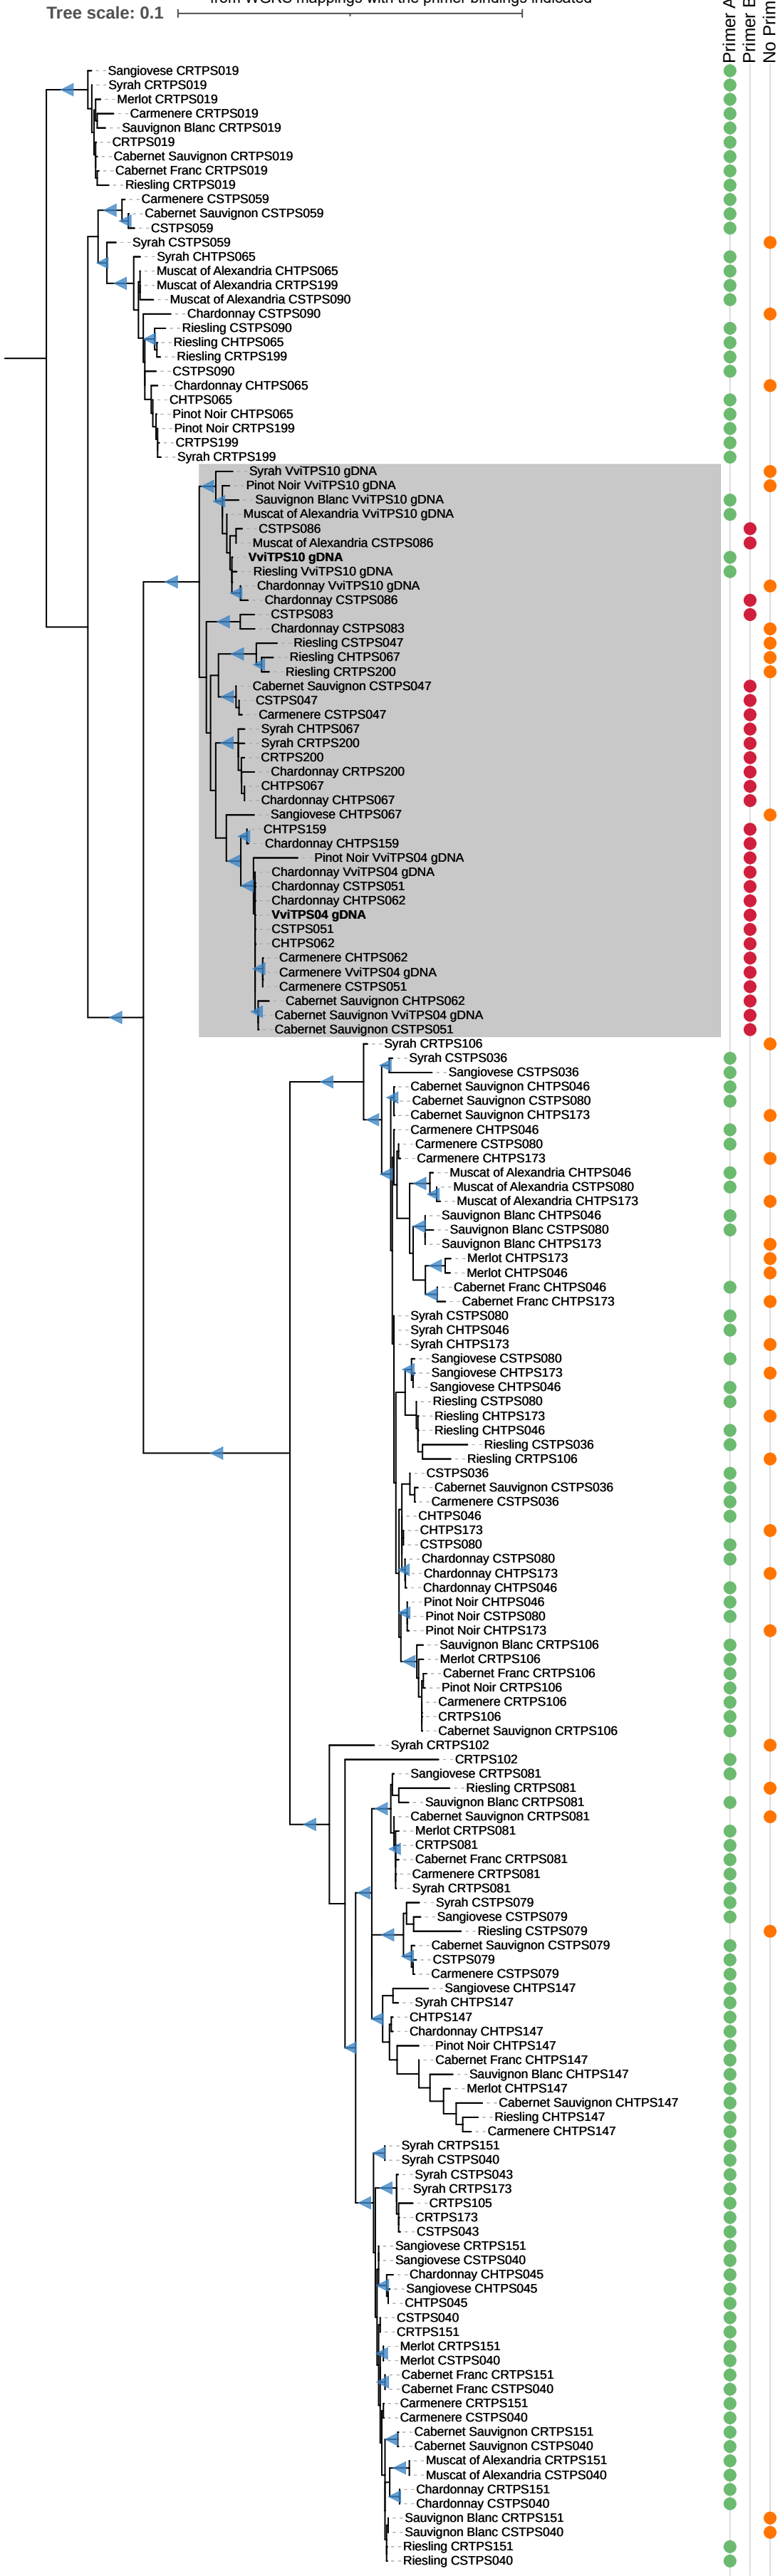

Supplement: s1 [file s1]
